# Supplementary material
Source: PubMed Central journal article supplement (PMC5637400)
Supplement: NIHMS909778-supplement-Supplemental.pdf [file NIHMS909778-supplement-Supplemental.pdf]

Supporting Information associated with manuscript:

## Protein-specific differential Glycosylation of Immunoglobulins in serum of Ovarian Cancer Patients

L. Renee Ruhaak<sup>1,\*</sup>, Kyoungmi Kim<sup>2</sup>, Carol Stroble<sup>1,3</sup>, Sandra L. Taylor<sup>2</sup>, Qiuting Hong<sup>1</sup>, Suzanne Miyamoto<sup>3</sup>, Carlito B. Lebrilla<sup>1</sup> and Gary Leiserowitz<sup>3,4</sup>

- Supplementary Table ST1. Characteristics of the transitions monitored in this study.
- Supplementary Figure SF1. Stability of the method used.
- Supplementary Table ST2. Classification metrics for peptides and glycopeptides from IgG.
- Supplementary Table ST3. Classification metrics for peptides and glycopeptides from IgA.
- Supplementary Table ST4. Classification metrics for peptides and glycopeptides from IgM.
- Supplementary Table ST5. Entry order and classification metrics for peptides and glycopeptides from all three proteins.

SUPPLEMENTARY INFORMATION

Supplementary Table ST1. Characteristics of the transitions monitored in this study.

| No. | Peptide | Glycopeptide | Protein    | Peptide                    | Site    | Glycan Moiety | Precursor Ion | Product Ion | Ret Time (min) | Collision Energy (eV) |
|-----|---------|--------------|------------|----------------------------|---------|---------------|---------------|-------------|----------------|-----------------------|
| 1   | x       |              | IgA1       | TPLTATLSK                  | -       | -             | 466.3         | 415.8       | 9.0            | 15                    |
| 2   | x       |              | IgA1/2     | YLTWASR                    | -       | -             | 448.7         | 620.3       | 10.8           | 12                    |
| 3   | x       |              | IgA2       | DASGATFTWTPSSGK            | -       | -             | 756.9         | 475.3       | 11.9           | 25                    |
| 4   | x       |              | IgG1       | FNWYVDGVEVHNAK             | -       | -             | 839.4         | 968.5       | 5.4            | 13.0                  |
| 5   | x       |              | IgG1/2/3/4 | DTLMISR                    | -       | -             | 418.2         | 506.3       | 4.5            | 9.0                   |
| 6   | x       |              | IgG2       | CCVECPAPPPVAGPSVFLFPPKPK   | -       | -             | 970.1         | 1100.6      | 6.1            | 28.0                  |
| 7   | x       |              | IgG3       | WYVDGVEVHNAK               | -       | -             | 472.9         | 534.3       | 4.7            | 6.0                   |
| 8   | x       |              | IgG4       | TTPPVLDSDGSFFLYSR          | -       | -             | 634.7         | 425.2       | 6.2            | 9.0                   |
| 9   | x       |              | IgM        | FTCTVTHTDLPSPLK            | -       | -             | 573.0         | 734.9       | 12.1           | 15                    |
| 10  |         | x            | IgA1/2     | LSLHRPALEDLLLSEANLTCTLTGLR | 144/131 | H3N5F0S0      | 1117.1        | 366.1       | 16.0           | 25.0                  |
| 11  |         | x            | IgA1/2     |                            | 144/131 | H4N4F0S1      | 943.9         | 366.1       | 16.0           | 20.0                  |
| 12  |         | x            | IgA1/2     |                            | 144/131 | H4N5F0S0      | 1157.6        | 366.1       | 16.0           | 30.0                  |
| 13  |         | x            | IgA1/2     |                            | 144/131 | H4N5F0S1      | 1230.4        | 366.1       | 16.0           | 25.0                  |
| 14  |         | x            | IgA1/2     |                            | 144/131 | H5N4F0S0      | 1147.3        | 366.1       | 16.0           | 25.0                  |
| 15  |         | x            | IgA1/2     |                            | 144/131 | H5N4F0S1      | 976.3         | 366.1       | 16.0           | 25.0                  |
| 16  |         | x            | IgA1/2     |                            | 144/131 | H5N4F0S2      | 1292.9        | 366.1       | 16.2           | 30.0                  |
| 17  |         | x            | IgA1/2     |                            | 144/131 | H5N5F0S0      | 1198.1        | 366.1       | 16.0           | 25.0                  |
| 18  |         | x            | IgA1/2     |                            | 144/131 | H5N5F0S1      | 1016.9        | 366.1       | 16.0           | 25.0                  |
| 19  |         | x            | IgA1/2     |                            | 144/131 | H5N5F0S2      | 1075.1        | 366.1       | 16.4           | 25.0                  |
| 20  |         | x            | IgA2       | TPLTANITK                  | 205     | H4N5F1S0      | 923.5         | 366.1       | 6.5            | 18.0                  |
| 21  |         | x            | IgA2       |                            | 205     | H5N4F1S0      | 909.8         | 366.1       | 6.2            | 19.0                  |
| 22  |         | x            | IgA2       |                            | 205     | H5N4F1S1      | 1006.8        | 366.1       | 6.9            | 25.0                  |
| 23  |         | x            | IgA2       |                            | 205     | H5N4F1S2      | 1103.8        | 366.1       | 7.5            | 25.0                  |

|    |  |   |        |                     |         |          |        |       |     |      |
|----|--|---|--------|---------------------|---------|----------|--------|-------|-----|------|
| 24 |  | x | IgA2   |                     | 205     | H5N5F1S0 | 977.5  | 366.1 | 6.4 | 25.0 |
| 25 |  | x | IgA2   |                     | 205     | H5N5F1S1 | 1074.5 | 366.1 | 6.9 | 25.0 |
| 26 |  | x | IgA2   |                     | 205     | H5N5F1S2 | 878.9  | 366.1 | 7.7 | 17.0 |
| 27 |  | x | IgG1   | EEQYNSTYR           | 180     | H3N4F1S0 | 878.8  | 204.1 | 2.3 | 13.0 |
| 28 |  | x | IgG1   |                     | 180     | H3N5F1S0 | 946.5  | 204.1 | 2.2 | 15.0 |
| 29 |  | x | IgG1   |                     | 180     | H4N4F0S0 | 884.1  | 204.1 | 2.2 | 14.0 |
| 30 |  | x | IgG1   |                     | 180     | H4N4F1S0 | 932.8  | 204.1 | 2.2 | 15.0 |
| 31 |  | x | IgG1   |                     | 180     | H4N4F1S1 | 1029.8 | 204.1 | 2.6 | 16.0 |
| 32 |  | x | IgG1   |                     | 180     | H4N5F0S0 | 951.7  | 204.1 | 2.3 | 15.0 |
| 33 |  | x | IgG1   |                     | 180     | H4N5F1S0 | 1000.5 | 204.1 | 2.3 | 16.0 |
| 34 |  | x | IgG1   |                     | 180     | H5N4F0S0 | 938.1  | 366.1 | 2.3 | 14.0 |
| 35 |  | x | IgG1   |                     | 180     | H5N4F1S0 | 986.8  | 366.1 | 2.3 | 15.0 |
| 36 |  | x | IgG1   |                     | 180     | H5N4F1S1 | 1083.8 | 366.1 | 2.6 | 17.0 |
| 37 |  | x | IgG1   |                     | 180     | H5N5F1S0 | 1054.5 | 366.1 | 2.3 | 17.0 |
| 38 |  | x | IgG2   | EEQFNSTFR           | 176     | H3N4F1S0 | 868.1  | 204.1 | 4.2 | 13.0 |
| 39 |  | x | IgG2   |                     | 176     | H3N5F1S0 | 935.8  | 204.1 | 4.1 | 14.0 |
| 40 |  | x | IgG2   |                     | 176     | H4N4F0S0 | 873.4  | 204.1 | 4.2 | 13.0 |
| 41 |  | x | IgG2   |                     | 176     | H4N4F1S0 | 922.1  | 204.1 | 4.1 | 25.0 |
| 42 |  | x | IgG2   |                     | 176     | H4N4F1S1 | 1019.1 | 204.1 | 4.3 | 25.0 |
| 43 |  | x | IgG2   |                     | 176     | H4N5F0S0 | 941.1  | 204.1 | 4.2 | 15.0 |
| 44 |  | x | IgG2   |                     | 176     | H4N5F1S0 | 989.9  | 204.1 | 4.1 | 15.0 |
| 45 |  | x | IgG2   |                     | 176     | H5N4F1S0 | 976.1  | 366.1 | 4.1 | 15.0 |
| 46 |  | x | IgG2   |                     | 176     | H5N4F1S1 | 1073.1 | 366.1 | 4.2 | 25.0 |
| 47 |  | x | IgG2   |                     | 176     | H5N5F1S0 | 1043.8 | 366.1 | 4.2 | 17.0 |
| 48 |  | x | IgG3/4 | EEQYNSTFR/EEQFNSTRY | 227/177 | H4N4F1S1 | 1024.5 | 204.1 | 3.8 | 17.0 |
| 49 |  | x | IgG3/4 |                     | 227/177 | H4N5F1S0 | 995.1  | 204.1 | 3.7 | 15.0 |
| 50 |  | x | IgG3/4 |                     | 227/177 | H5N4F1S1 | 1078.4 | 366.1 | 3.8 | 17.0 |

|    |  |   |        |                        |         |          |        |        |      |      |
|----|--|---|--------|------------------------|---------|----------|--------|--------|------|------|
| 51 |  | x | IgG3/4 |                        | 227/177 | H3N5F1S0 | 941.1  | 204.1  | 3.7  | 15.0 |
| 52 |  | x | IgG3/4 |                        | 227/177 | H4N4F1S0 | 927.4  | 204.1  | 3.7  | 14.0 |
| 53 |  | x | IgM    | YKNNSDISSTR            | 46      | H4N3F1S1 | 993.8  | 366.1  | 2.2  | 25.0 |
| 54 |  | x | IgM    |                        | 46      | H4N4F0S1 | 1012.8 | 366.1  | 2.2  | 25.0 |
| 55 |  | x | IgM    |                        | 46      | H5N4F1S1 | 1115.5 | 366.1  | 2.2  | 25.0 |
| 56 |  | x | IgM    |                        | 46      | H5N4F1S2 | 909.6  | 366.1  | 2.3  | 14.0 |
| 57 |  | x | IgM    |                        | 46      | H5N5F0S1 | 851.1  | 366.1  | 2.2  | 14.0 |
| 58 |  | x | IgM    |                        | 46      | H5N5F0S2 | 923.9  | 366.1  | 2.3  | 19.0 |
| 59 |  | x | IgM    |                        | 46      | H5N5F1S1 | 1183.2 | 366.1  | 2.3  | 25.0 |
| 60 |  | x | IgM    |                        | 46      | H5N6F0S1 | 901.9  | 366.1  | 2.3  | 14.0 |
| 61 |  | x | IgM    | GLTFQQNASSMCVPDQDTAIR  | 209     | H4N5F1S1 | 1110.8 | 366.1  | 12.4 | 24.0 |
| 62 |  | x | IgM    |                        | 209     | H5N4F1S1 | 1100.5 | 366.1  | 12.4 | 19.0 |
| 63 |  | x | IgM    |                        | 209     | H5N4F1S2 | 1173.3 | 366.1  | 12.5 | 23.0 |
| 64 |  | x | IgM    |                        | 209     | H5N5F1S1 | 1151.3 | 366.1  | 12.4 | 25.0 |
| 65 |  | x | IgM    |                        | 209     | H5N5F1S2 | 1224.1 | 366.1  | 12.5 | 25.0 |
| 66 |  | x | IgM    | STGKPTLYNVSLVMSDTAGTCY | 439     | H5N2F0S0 | 1194.5 | 1284.7 | 13.6 | 24.0 |
| 67 |  | x | IgM    |                        | 439     | H6N2F0S0 | 1248.5 | 1284.7 | 13.6 | 24.0 |
| 68 |  | x | IgM    |                        | 439     | H7N2F0S0 | 1302.6 | 1284.7 | 13.6 | 27.0 |
| 69 |  | x | IgM    |                        | 439     | H8N2F0S0 | 1356.6 | 1284.7 | 13.5 | 27.0 |
| 70 |  | x | IgM    |                        | 439     | H9N2F0S0 | 1058.3 | 1284.7 | 13.5 | 27.0 |
| 71 |  | x | IgM    |                        | 439     | -        | 1183.1 | 342.1  | 14.3 | 38.0 |

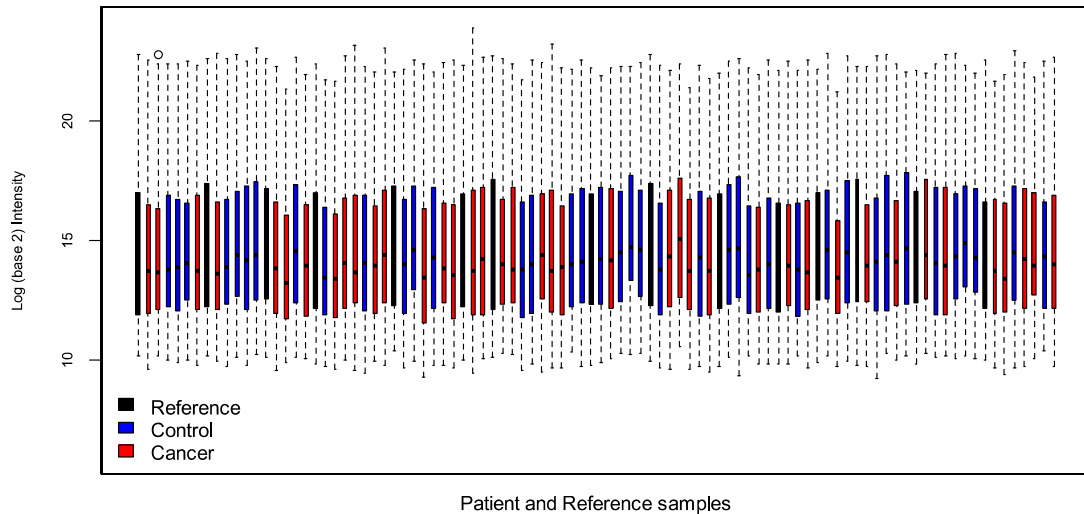

**Supplementary Figure SF1. Stability of the method used.** The distribution of log<sub>2</sub> transformed intensities is plotted for each sample, including the reference samples. These results indicate good stability and repeatability of the method used.

| Protein | Glycopeptide                                | AUC          | Accuracy     | Sensitivity  | Specificity  |
|---------|---------------------------------------------|--------------|--------------|--------------|--------------|
| IgG 1   | <b>N<sup>180</sup> - H5N5F1</b>             | <b>0.941</b> | <b>0.886</b> | <b>0.846</b> | <b>0.925</b> |
| IgG 1   | <b>N<sup>180</sup> - H5N4F1</b>             | <b>0.924</b> | <b>0.848</b> | <b>0.897</b> | <b>0.800</b> |
| IgG 1   | <b>N<sup>180</sup> - H5N4F1S1</b>           | <b>0.908</b> | <b>0.824</b> | <b>0.872</b> | <b>0.775</b> |
| IgG 1   | <b>N<sup>180</sup> - H3N4F1</b>             | <b>0.842</b> | <b>0.810</b> | <b>0.718</b> | <b>0.900</b> |
| IgG 1   | <b>N<sup>180</sup> - H4N5F1</b>             | <b>0.904</b> | <b>0.797</b> | <b>0.821</b> | <b>0.775</b> |
| IgG 1   | <b>N<sup>180</sup> - H5N4</b>               | <b>0.852</b> | <b>0.785</b> | <b>0.821</b> | <b>0.750</b> |
| IgG 1   | <b>N<sup>180</sup> - H4N5</b>               | <b>0.851</b> | <b>0.785</b> | <b>0.821</b> | <b>0.750</b> |
| IgG 1   | <b>N<sup>180</sup> - H4N4F1</b>             | <b>0.865</b> | <b>0.759</b> | <b>0.769</b> | <b>0.750</b> |
| IgG 2   | <b>N<sup>176</sup> - H4N5F1</b>             | <b>0.733</b> | <b>0.696</b> | <b>0.641</b> | <b>0.750</b> |
| IgG 1   | N <sup>180</sup> - H4N4F1S1                 | 0.717        | 0.696        | 0.718        | 0.675        |
| IgG 2   | N <sup>176</sup> - H3N4F1                   | 0.714        | 0.696        | 0.615        | 0.775        |
| IgG 2   | N <sup>176</sup> - H4N4F1S1                 | 0.666        | 0.671        | 0.462        | 0.875        |
| IgG 1   | N <sup>180</sup> - H4N4                     | 0.843        | 0.671        | 0.718        | 0.625        |
| IgG 2   | N <sup>176</sup> - H5N4F1                   | 0.729        | 0.658        | 0.615        | 0.700        |
| IgG     | Total protein                               | 0.630        | 0.633        | 0.359        | 0.900        |
| IgG 2   | N <sup>176</sup> - H4N4F1                   | 0.688        | 0.607        | 0.564        | 0.650        |
| IgG 1   | Total subclass 1                            | 0.669        | 0.595        | 0.590        | 0.600        |
| IgG 3/4 | N <sup>227</sup> /N <sup>177</sup> - H3N4F1 | 0.671        | 0.595        | 0.615        | 0.575        |
| IgG 3/4 | N <sup>227</sup> /N <sup>177</sup> - H4N5F1 | 0.648        | 0.519        | 0.538        | 0.500        |

**Supplementary Table ST2.** Classification metrics for each peptide/glycopeptide from IgG of which levels were significantly different for EOC in the discovery set. Accuracy was estimated using LOOCV. AUC, Fold change, Threshold, sensitivity and specificity were calculated using the whole discovery set. Bold font indicates that these glycopeptides were included in the best performing multiplexed classifier.

| Protein | Glycopeptide                                    | AUC          | Accuracy     | Sensitivity  | Specificity  |
|---------|-------------------------------------------------|--------------|--------------|--------------|--------------|
| IgA 1/2 | <b>N<sup>144</sup>/N<sup>133</sup> – H4N5</b>   | <b>0.810</b> | <b>0.788</b> | <b>0.717</b> | <b>0.926</b> |
| IgA 1/2 | <b>N<sup>144</sup>/N<sup>133</sup> – H4N4S1</b> | <b>0.804</b> | <b>0.763</b> | <b>0.839</b> | <b>0.714</b> |
| IgA 1/2 | <b>N<sup>144</sup>/N<sup>133</sup> – H5N4S1</b> | <b>0.783</b> | <b>0.750</b> | <b>0.685</b> | <b>0.885</b> |
| IgA 1/2 | <b>N<sup>144</sup>/N<sup>133</sup> – H3N5</b>   | <b>0.791</b> | <b>0.738</b> | <b>0.711</b> | <b>0.771</b> |
| IgA 1/2 | <b>N<sup>144</sup>/N<sup>133</sup> – H4N5S1</b> | <b>0.867</b> | <b>0.738</b> | <b>0.757</b> | <b>0.721</b> |
| IgA 2   | <b>N<sup>205</sup> – H5N5F1</b>                 | <b>0.868</b> | <b>0.738</b> | <b>0.732</b> | <b>0.744</b> |
| IgA 2   | <b>N<sup>205</sup> – H5N5F1S1</b>               | <b>0.695</b> | <b>0.738</b> | <b>0.673</b> | <b>0.880</b> |
| IgA 2   | N <sup>205</sup> – H5N5F1S2                     | 0.821        | 0.725        | 0.737        | 0.714        |
| IgA 2   | Total isoform 2                                 | 0.762        | 0.700        | 0.629        | 0.944        |
| IgA 1/2 | N <sup>144</sup> /N <sup>133</sup> - H5N4       | 0.746        | 0.700        | 0.711        | 0.691        |
| IgA 2   | N <sup>205</sup> – H4N5F1                       | 0.744        | 0.688        | 0.667        | 0.714        |
| IgA 1   | Total isoform 1                                 | 0.723        | 0.663        | 0.676        | 0.651        |
| IgA 1/2 | N <sup>144</sup> /N <sup>133</sup> – H5N5S1     | 0.702        | 0.663        | 0.633        | 0.710        |
| IgA 2   | N <sup>205</sup> – H5N4F1S1                     | 0.645        | 0.663        | 0.659        | 0.667        |
| IgA 1/2 | N <sup>144</sup> /N <sup>133</sup> – H5N4S2     | 0.721        | 0.638        | 0.597        | 0.739        |
| IgA     | Total IgA                                       | 0.657        | 0.575        | 0.594        | 0.563        |

**Supplementary Table ST3.** Classification metrics for each peptide/glycopeptide from IgA of which levels were significantly different for EOC in the discovery set. Accuracy was estimated using LOOCV. AUC, Fold change, Threshold, sensitivity and specificity were calculated using the whole discovery set. Bold font indicates that these glycopeptides were included in the best performing multiplexed classifier.

| Protein | Glycopeptide                      | AUC          | Accuracy     | Sensitivity  | Specificity  |
|---------|-----------------------------------|--------------|--------------|--------------|--------------|
| IgM     | <b>N<sup>209</sup> - H4N5F1F1</b> | <b>0.797</b> | <b>0.750</b> | <b>0.727</b> | <b>0.778</b> |
| IgM     | <b>N<sup>46</sup> - H5N4F1S1</b>  | <b>0.739</b> | <b>0.713</b> | <b>0.698</b> | <b>0.730</b> |
| IgM     | <b>N<sup>46</sup> - H4N3F1S1</b>  | <b>0.719</b> | <b>0.700</b> | <b>0.682</b> | <b>0.722</b> |
| IgM     | <b>N<sup>209</sup> - H5N4F1S1</b> | <b>0.736</b> | <b>0.700</b> | <b>0.654</b> | <b>0.786</b> |
| IgM     | <b>N<sup>209</sup> - H5N5F1S2</b> | <b>0.707</b> | <b>0.688</b> | <b>0.660</b> | <b>0.727</b> |
| IgM     | Total protein                     | 0.685        | 0.663        | 0.628        | 0.724        |
| IgM     | N <sup>439</sup> - H8N2           | 0.660        | 0.663        | 0.651        | 0.676        |
| IgM     | N <sup>439</sup> - H7N2           | 0.683        | 0.613        | 0.596        | 0.636        |
| IgM     | N <sup>209</sup> - H5N4F1S2       | 0.743        | 0.575        | 0.583        | 0.568        |
| IgM     | N <sup>46</sup> - H5N5S2          | 0.658        | 0.500        | 0.500        | 0.500        |

**Supplementary Table ST4.** Classification metrics for each peptide/glycopeptide from IgM of which levels were significantly different for EOC in the discovery set. Accuracy was estimated using LOOCV. AUC, Fold change, Threshold, sensitivity and specificity were calculated using the whole discovery set. Bold font indicates that these glycopeptides were included in the best performing multiplexed classifier.



| Entry Order | Protein | Glycopeptide                                | Accuracy |
|-------------|---------|---------------------------------------------|----------|
| 1           | IgG 1   | N <sup>180</sup> - H5N5F1                   | 88.6     |
| 2           | IgG 1   | N <sup>180</sup> - H5N4F1                   | 86.7     |
| 3           | IgA 2   | N <sup>205</sup> - H5N5F1S2                 | 91.1     |
| 4           | IgM     | N <sup>46</sup> - H5N4F1S1                  | 89.2     |
| 5           | IgA 1   | Total isoform 1                             | 91.1     |
| 6           | IgG 1   | N <sup>180</sup> - H3N4F1                   | 90.5     |
| 7           | IgM     | N <sup>209</sup> - H5N5F1S2                 | 92.4     |
| 8           | IgA 1/2 | N <sup>144</sup> /N <sup>133</sup> - H5N4   | 91.1     |
| 9           | IgM     | N <sup>46</sup> - H5N5S2                    | 92.4     |
| 10          | IgG 2   | N <sup>176</sup> - H3N4F1                   | 92.4     |
| 11          | IgG 1   | N <sup>180</sup> - H4N5F1                   | 96.2     |
| 12          | IgA 1/2 | N <sup>144</sup> /N <sup>133</sup> - H4N4S1 | 94.3     |
| 13          | IgG 1   | N <sup>180</sup> - H4N4F1S1                 | 96.2     |
| 14          | IgG     | Total protein                               | 94.3     |
| 15          | IgG 1   | N <sup>180</sup> - H4N4                     | 96.2     |
| 16          | IgM     | N <sup>439</sup> - H8N2                     | 94.9     |
| 17          | IgA 2   | N <sup>205</sup> - H4N5F1                   | 96.2     |
| 18          | IgA 2   | N <sup>205</sup> - H5N4F1S1                 | 94.3     |
| 19          | IgA     | Total IgA                                   | 94.9     |
| 20          | IgG 1   | N <sup>180</sup> - H5N4                     | 94.3     |
| 21          | IgG 2   | N <sup>176</sup> - H4N4F1S1                 | 94.9     |
| 22          | IgG 2   | N <sup>176</sup> - H4N5F1                   | 93.7     |
| 23          | IgA 1/2 | N <sup>144</sup> /N <sup>133</sup> - H4N5   | 94.9     |
| 24          | IgG 1   | N <sup>180</sup> - H5N4F1S1                 | 94.3     |
| 25          | IgM     | Total protein                               | 94.9     |
| 26          | IgG 1   | N <sup>180</sup> - H4N5                     | 93.7     |
| 27          | IgA 1/2 | N <sup>144</sup> /N <sup>133</sup> - H3N5   | 94.9     |
| 28          | IgA 1/2 | N <sup>144</sup> /N <sup>133</sup> - H4N5S1 | 94.3     |
| 29          | IgG 3/4 | N <sup>227</sup> /N <sup>177</sup> - H4N5F1 | 94.9     |
| 30          | IgG 3/4 | N <sup>227</sup> /N <sup>177</sup> - H3N4F1 | 94.3     |
| 31          | IgG 2   | N <sup>176</sup> - H4N4F1                   | 94.9     |
| 32          | IgG 1   | N <sup>180</sup> - H4N4F1                   | 93.7     |
| 33          | IgG 1   | Total subclass 1                            | 93.7     |
| 34          | IgM     | N <sup>46</sup> - H4N3F1S1                  | 92.4     |
| 35          | IgA 1/2 | N <sup>144</sup> /N <sup>133</sup> - H5N5S1 | 92.4     |
| 36          | IgG 2   | N <sup>176</sup> - H5N4F1                   | 92.4     |
| 37          | IgM     | N <sup>209</sup> - H5N4F1S1                 | 92.4     |
| 38          | IgA 1/2 | N <sup>144</sup> /N <sup>133</sup> - H5N4S2 | 92.4     |
| 39          | IgA 2   | Total isoform 2                             | 92.4     |
| 40          | IgA 2   | N <sup>205</sup> - H5N5F1                   | 90.5     |
| 41          | IgA 1/2 | N <sup>144</sup> /N <sup>133</sup> - H5N4S1 | 89.9     |
| 42          | IgM     | N <sup>209</sup> - H5N4F1S2                 | 88.0     |
| 43          | IgA 2   | N <sup>205</sup> - H5N5F1S1                 | 86.1     |
| 44          | IgM     | N <sup>209</sup> - H4N5F1F1                 | 85.4     |
| 45          | IgM     | N <sup>439</sup> - H7N2                     | 83.5     |

**Supplementary Table ST5.** Entry order and classification metrics for each peptide/glycopeptide from all three proteins of which levels were significantly different for EOC in the discovery set. Accuracy represents the accuracy of a multiplexed classifier including the glycopeptide indicated and all of the

glycopeptides above. Accuracies were estimated using LOOCV using set OC1. **Bold font indicates that these glycopeptides were included in the best performing multiplexed classifier.**
